# Supplementary material
Source: PubMed Central journal article supplement (PMC10524954)
Supplement: NIHMS1899967-supplement-1.pdf [file NIHMS1899967-supplement-1.pdf]

## Lung Cancer Screening in People with HIV: A Mixed-Methods Study of Patient and Provider Perspectives

Authors: Matthew Triplette, MD, MPH, Meagan C. Brown, PhD, Madison Snidarich, BA, Jehan Z. Budak, MD, Nicholas Giustini, MD, Nicholas Murphy, MD, Perrin E. Romine, MD, Bryan J. Weiner, PhD, Kristina Crothers, MD

American Journal of Preventive Medicine

### Appendix

Appendix Table 1. Patient and provider survey responses on lung cancer screening attitudes, beliefs and knowledge.

| Question prompt                                                                 | Strongly Disagree | Somewhat Disagree | Somewhat Agree | Strongly Agree |
|---------------------------------------------------------------------------------|-------------------|-------------------|----------------|----------------|
| <b>Patient Participants (n=64)<sup>a</sup></b>                                  |                   |                   |                |                |
| I have heard of lung cancer screening                                           | 0                 | 1 (2%)            | 9 (14%)        | 54 (84%)       |
| My healthcare providers have recommended I get lung cancer screening            | 19 (30%)          | 14 (22%)          | 13 (21%)       | 17 (27%)       |
| I follow my provider's recommendations on which healthcare services to get      | 0                 | 1 (2%)            | 7 (11%)        | 56 (88%)       |
| If my provider recommended lung cancer screening, I would get it                | 0                 | 0                 | 3 (3%)         | 61 (95%)       |
| My history of HIV puts me at higher risk for lung cancer                        | 2 (4%)            | 6 (11%)           | 17 (31%)       | 30 (55%)       |
| My history of HIV impacts my overall health                                     | 6 (9%)            | 4 (6%)            | 9 (14%)        | 45 (70%)       |
| It is important to understand how my HIV affects my risk for other diseases     | 1 (2%)            | 0                 | 7 (11%)        | 56 (88%)       |
| I want healthcare designed for persons living with HIV                          | 2 (3%)            | 1 (2%)            | 7 (11%)        | 54 (84%)       |
| <b>Provider Participants (n=11)</b>                                             |                   |                   |                |                |
| I am very familiar with lung cancer screening guidelines                        | 0                 | 0                 | 11 (100%)      | 0              |
| Lung cancer screening is very effective at preventing lung cancer               | 0                 | 2 (18%)           | 6 (55%)        | 3 (27%)        |
| The research evidence for lung cancer screening is strong                       | 0                 | 2 (18%)           | 6 (55%)        | 3 (27%)        |
| Lung cancer screening has more benefits than harms                              | 1 (9%)            | 1 (9%)            | 6 (55%)        | 3 (27%)        |
| Patients with significant comorbidity do not benefit from lung cancer screening | 5 (45%)           | 4 (36%)           | 2 (18%)        | 0              |
| Patients with poorly controlled HIV do not benefit from lung cancer screening   | 6 (55%)           | 3 (27%)           | 2 (18%)        | 0              |
| I discuss lung cancer screening with all my patients who are eligible           | 0                 | 2 (18%)           | 4 (36%)        | 5 (45%)        |

|                                                                                             |         |         |         |          |
|---------------------------------------------------------------------------------------------|---------|---------|---------|----------|
| I am comfortable performing shared decision making for lung cancer screening                | 0       | 0       | 4 (46%) | 7 (64%)  |
| I have used web-based or paper decision aids to discuss lung cancer screening with patients | 3 (27%) | 5 (45%) | 3 (27%) | 0        |
| I need additional tools to discuss lung cancer screening with my patients                   | 1 (9%)  | 1 (9%)  | 8 (73%) | 1 (9%)   |
| Lung cancer is a major problem for people with HIV                                          | 0       | 2 (18%) | 5 (45%) | 4 (36%)  |
| Cigarette smoking is a major problem for people with HIV                                    | 0       | 0       | 1 (9%)  | 10 (91%) |
| Healthcare guidelines should be tailored to people with HIV                                 | 0       | 0       | 2 (18%) | 9 (82%)  |

<sup>a</sup>Not all rows add to 64 as some participants skipped questions. Missing responses were not imputed.

Appendix Table 2. Provider demographic data

| Characteristic, n (%) or median (IQR)          | Survey/Interview participants<br>(n=11) |
|------------------------------------------------|-----------------------------------------|
| <b>Gender</b>                                  |                                         |
| Female                                         | 10 (91%)                                |
| Male                                           | 1 (9%)                                  |
| Other                                          | 0                                       |
| <b>Age, Median</b>                             | 44 (39-50)                              |
| <b>Race</b>                                    |                                         |
| American Indian/Alaska Native                  | 0                                       |
| Asian                                          | 2 (18%)                                 |
| Black/African American                         | 0                                       |
| Native Hawaiian or other Pacific Islander      | 0                                       |
| White                                          | 9 (82%)                                 |
| Other                                          | 0                                       |
| Hispanic ethnicity                             | 0                                       |
| <b>Medical Specialty</b>                       |                                         |
| General Internal Medicine                      | 0                                       |
| Family Practice                                | 1 (9%)                                  |
| HIV Fellowship                                 | 0                                       |
| Infectious Diseases                            | 9 (82%)                                 |
| Other                                          | 1 (9%)                                  |
| <b>Level of training</b>                       |                                         |
| Resident physician                             | 0                                       |
| Fellow physician                               | 1 (9%)                                  |
| Attending physician                            | 9 (82%)                                 |
| Advanced Practice Provider                     | 1 (9%)                                  |
| <b>Percent of time in outpatient clinic</b>    |                                         |
| <10%                                           | 2 (18%)                                 |
| 11-25%                                         | 4 (36%)                                 |
| 26-50%                                         | 3 (27%)                                 |
| 51-75%                                         | 1 (9%)                                  |
| >75%                                           | 1 (9%)                                  |
| <b>Percent of clinical time caring for PWH</b> |                                         |
| <10%                                           | 0                                       |
| 11-25%                                         | 2 (18%)                                 |
| 26-50%                                         | 2 (18%)                                 |
| 51-75%                                         | 3 (27%)                                 |
| >75%                                           | 4 (36%)                                 |

Abbreviations: PWH=people with HIV
